# Supplementary material for: N-Alkylation vs. O-alkylation: influence on the performance of the photovoltaic cells based on a tetracyclic lactam polymer donor
Source: Royal Society of Chemistry journal article supplement (doi:10.1039/c9ra01545k), 2019-01-01

**Supporting Information  
For**

***N*-alkylation vs. *O*-alkylation: Influence on the Performance of the Photovoltaic Cells based on a Tetracyclic Lactam Polymer Donor**

Chenchen Li,<sup>a,c</sup> Mian Cai,<sup>\*b,c</sup> Xichang Bao,<sup>c</sup> Yanfang Liu,<sup>c</sup> Renqiang Yang<sup>c</sup> and Xiaobo Wan<sup>\* a,c</sup>

<sup>a</sup> Key Laboratory of Optoelectronic Chemical Materials and Devices, Ministry of Education, School of Chemical & Environmental Engineering, Jiangnan University, Wuhan 430056, P. R. China

<sup>b</sup> College of Electronic Engineering and Automation, Shandong University of Science and Technology, 266590 Qingdao, China

<sup>c</sup> Qingdao Institute of Bioenergy & Bioprocess Technology, Chinese Academy of Sciences, 189 Songling Road, Qingdao 266101, People's Republic of China

**Contents**

|                                                       |     |
|-------------------------------------------------------|-----|
| Synthetic Procedures .....                            | S2  |
| Figures S1-S4.....                                    | S6  |
| Table S1.....                                         | S8  |
| <sup>1</sup> H and <sup>13</sup> C NMR spectras ..... | S9  |
| IR spectrums.....                                     | S19 |

## Synthetic procedures

### Scheme S1. Synthesis of alkylated DBND.

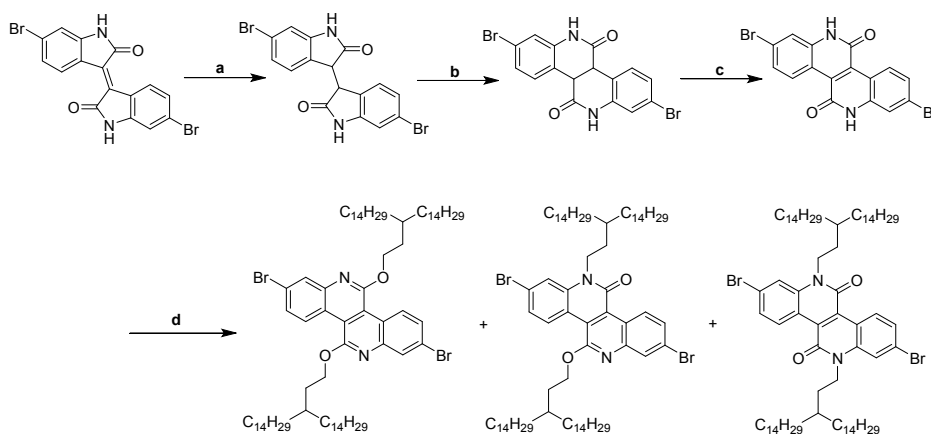

The synthesis of DBND is followed by our previous work: **a)** Zn, CF<sub>3</sub>COOH, THF, r.t. 1h, quantitative; **b)** HCl (conc.), THF, 100 °C, 8 h, 61%; **c)** K<sub>2</sub>CO<sub>3</sub>, DMF, bubbling air, r.t., 48 h, quantitative; **d)** K<sub>2</sub>CO<sub>3</sub>, DMF, 15-(2-iodoethyl)nonacosane, 110 °C, 36 h, 50% of *O*-DBND, 33% of *H*-DBND and 10% of *N*-DBND.

### 6,6'-Dibromo-[3, 3'-biindoline]-2, 2'-dione

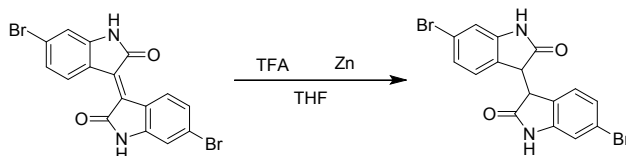

TFA (4.7 ml, 60 mmol) was added dropwise to a cooled (0 °C) suspension of **IID** (1 g, 2.39 mmol) and activated Zn dust (940 mg, 14.5 mmol) in THF (125 ml) solution. The mixture was stirred at r.t. for 1 h. Then the mixture was precipitated into a stirring H<sub>2</sub>O (500 ml). The white solid obtained were collected on a filter and washed with H<sub>2</sub>O and dried under reduced pressure. <sup>1</sup>H-NMR (DMSO-*d*<sub>6</sub>, 600 MHz) δ: 10.51 (s, 2H), 7.09 (d, *J* = 8.02 Hz, 2H), 6.95 (s, 2H), 6.75 (d, *J* = 8.02 Hz, 2H), 4.19 (s, 2H). <sup>13</sup>C-NMR (DMSO-*d*<sub>6</sub>, 150 MHz) δ: 176.33, 145.45, 126.83, 125.72, 124.47, 121.46, 112.71, 45.70.

### 2, 8-Dibromo-10b, 12-dihydrodibenzo[*c, h*][2, 6]naphthyridine-5, 11(4bH, 6H)-dione

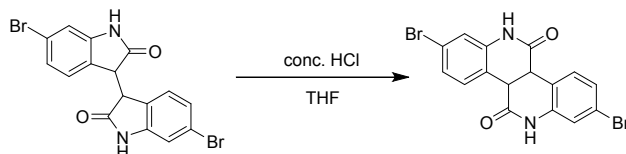

A suspension of 6,6'-dibromo-[3,3'-biindoline]-2,2'-dione (1 g, 2.38 mmol) in conc. HCl (10 ml) and THF (20 ml) was added to a Schlenk tube. The mixture was stirred for 10 h at 100 °C. The mixture was then cooled down to r.t. and the precipitate was collected on a filter and washed with water, ethanol and ethyl acetate to give a white solid which was pure enough to carry out on next step (609 mg, 61%). <sup>1</sup>H-NMR (DMSO-*d*<sub>6</sub>, 600 MHz) δ: 10.58 (s, 2H), 7.20-7.16 (m, 4H), 7.06 (s, 2H), 4.23 (s, 2H). <sup>13</sup>C-NMR (DMSO-*d*<sub>6</sub>, 150 MHz) δ: 168.29, 139.53, 132.29, 125.12, 121.28, 120.13, 118.01.

## 2,8-Dibromodibenzo[c,h][2,6]naphthyridine-5,11(6H,12H)-dione

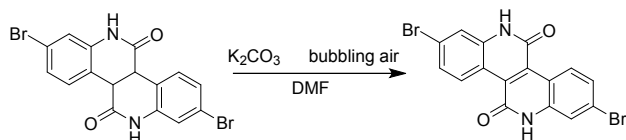

To a solution of 2,8-dibromo-10b,12-dihydrodibenzo[c,h][2,6]naphthyridine-5,11(4bH,6H)-dione in DMF (0.01 M) was added K<sub>2</sub>CO<sub>3</sub> (4 Eq.). The suspension was stirred for 48 h with air bubbling into the system. The yellow solid (almost quantitative) obtained was filtered and washed with water then THF before drying under reduced pressure, which was to carry out on next step.

## Alkylated DBND

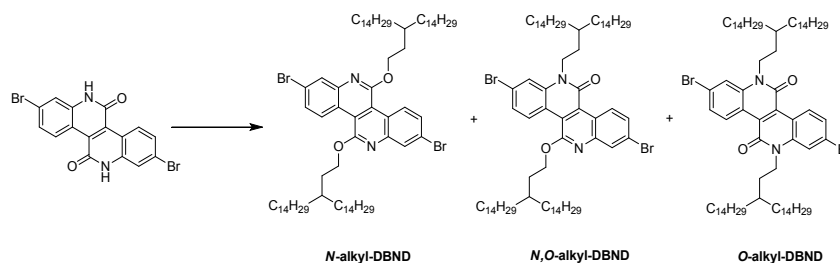

To a suspension of K<sub>2</sub>CO<sub>3</sub> (995 mg, 7.2 mmol) in DMF (60 ml) was added DBND (600 mg, 1.44 mmol) and 15-(2-iodoethyl)nonacosane (2.04 g, 3.6 mmol). The mixture was stirred at 110 °C for 36 h before filtration. The filtrate was concentrated under reduced pressure. The obtained crude product was then purified by column chromatography on silica gel eluted with petroleum ether to give a white solid compound *O*-alkyl-DBND (0.93 g, 50%), white solid *N,O*-alkyl-DBND (0.61 mg, 33%) and

yellow solid *N*-alkyl-DBND (0.19 g, 10%). Monomers were then further purified by recrystallization before polymerization.

***O*-alkyl-DBND:** <sup>1</sup>H-NMR (CDCl<sub>3</sub>, 600 MHz) δ: 9.28 (d, *J*=9.24 Hz, 2H), 8.10 (s, 2H), 7.58 (d, *J*=9.24 Hz, 2H), 4.74 (t, *J*=6.82 Hz, 4H), 1.96 (m, 4H), 1.67 (m, 2H), 1.44-1.18 (m, 104H), 0.87 (m, 12H). <sup>13</sup>C-NMR (CDCl<sub>3</sub>, 150 MHz) δ: 159.25, 145.57, 129.66, 129.27, 128.14, 123.33, 122.47, 119.40, 66.04, 34.98, 33.86, 32.83, 31.94, 30.12, 29.77, 29.74, 29.72, 29.68, 29.39, 26.77, 22.77, 14.13.

***N,O*-alkyl-DBND:** <sup>1</sup>H-NMR (CDCl<sub>3</sub>, 600 MHz) δ: 9.81 (d, *J*=9.29 Hz, 1H), 9.25 (d, *J*=9.29 Hz, 1H), 8.05 (s, 1H), 7.61 (d, *J*=9.04 Hz, 1H), 7.58 (s, 1H), 7.42 (d, *J*=9.04 Hz, 1H), 4.71 (t, *J*=6.71 Hz, 2H), 4.37 (s, 2H), 1.93 (m, 2H), 1.76 (m, 2H), 1.61 (m, 2H), 1.50-1.10 (m, 104H), 0.87 (m, 12H). <sup>13</sup>C-NMR (CDCl<sub>3</sub>, 150 MHz) δ: 160.16, 158.49, 145.67, 138.68, 130.74, 129.29, 129.26, 128.93, 128.00, 125.29, 124.50, 124.02, 121.11, 121.03, 117.11, 116.14, 66.21, 42.32, 36.32, 35.00, 33.83, 33.61, 32.78, 31.95, 30.64, 30.11, 30.10, 29.76, 29.74, 29.73, 29.69, 29.68, 29.39, 26.79, 26.77, 22.71, 14.13.

***N*-alkyl-DBND:** <sup>1</sup>H-NMR (CDCl<sub>3</sub>, 600 MHz) δ: 9.80 (d, *J*=9.14 Hz, 2H), 7.56 (s, 2H), 7.45 (d, *J*=9.14 Hz, 2H), 4.36 (s, 4H), 1.74 (m, 4H), 1.58 (m, 2H), 1.50-1.10 (m, 104H), 0.87 (m, 12H). <sup>13</sup>C-NMR (CDCl<sub>3</sub>, 150 MHz) δ: 159.84, 138.62, 130.91, 126.67, 125.91, 125.19, 117.36, 116.77, 42.48, 36.30, 33.60, 31.95, 30.69, 30.10, 29.74, 29.69, 29.39, 26.78, 22.71, 22.70, 14.14.

## Procedures for Stille Polymerization and Polymer Purification

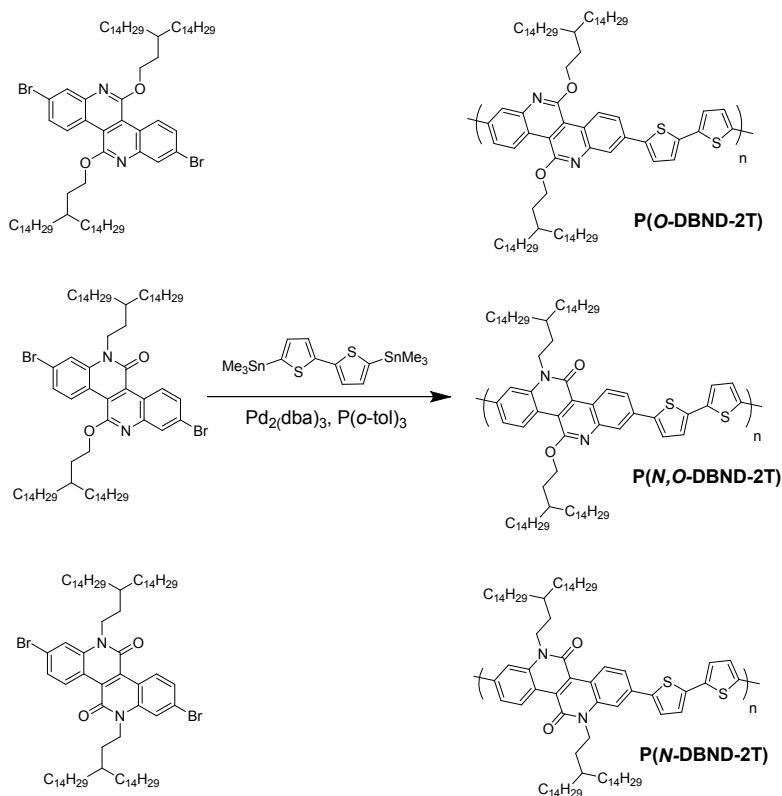

Alkylated DBND (0.1 mmol), 5,5'-bis(trimethylstannyl)-2,2'-bithiophene (0.1 mmol),  $\text{Pd}_2(\text{dba})_3$  (1.2 mmol%),  $\text{P}(o\text{-tol})_3$  (9.6 mmol%) and 2.5 mL of toluene were added to a Schlenk tube. The tube was charge with argon through a freeze-pump-thaw cycle for three times. The mixture was stirred for 72 h at 110 °C. And then the mixture was precipitated into methanol (100 mL). The precipitate was filtered and purified via Soxhlet extraction for 8 hours with methanol, 12 h with hexane, (for P(N-DBND-2T) another 12 h with chloroform are needed) and finally was collected with chloroform (for P(N-DBND-2T) was collected with *o*-dichlorobenzene). The solution was then concentrated and precipitated into methanol (100 mL). Yield 94% for P(O-DBND-2T), yellow solid, 96% for P(N,O-DBND-2T), yellow solid and 86% for P(N-DBND-2T), red solid.

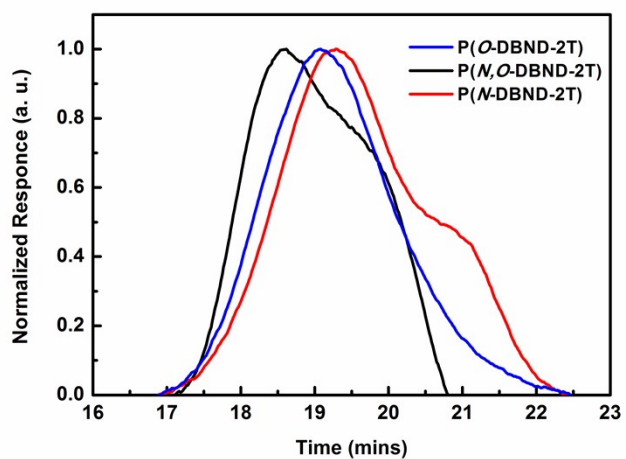

**Figure S1.** Gel permeation chromatography (GPC) results of polymers.

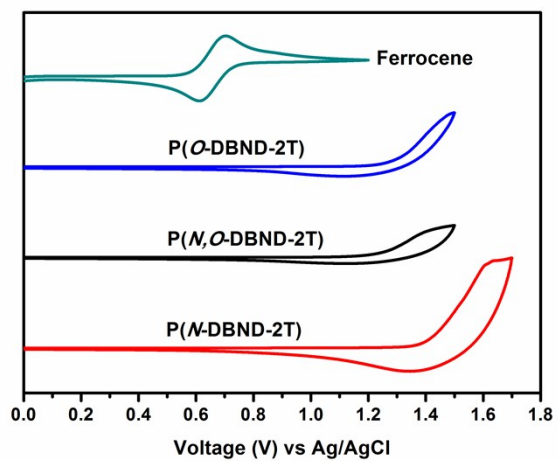

**Figure S2.** The electrochemical cyclic voltammetry measurement of polymer films.

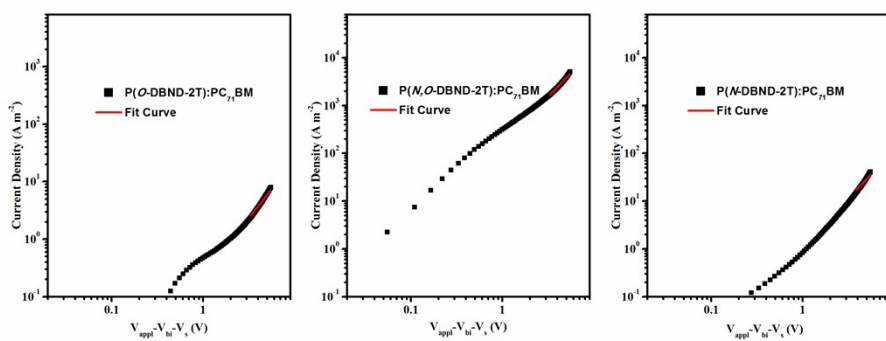

**Figure S3.** Space-charge-limited current (SCLC) density-voltage curves of hole only devices of polymer blended films (1:2, w/w).

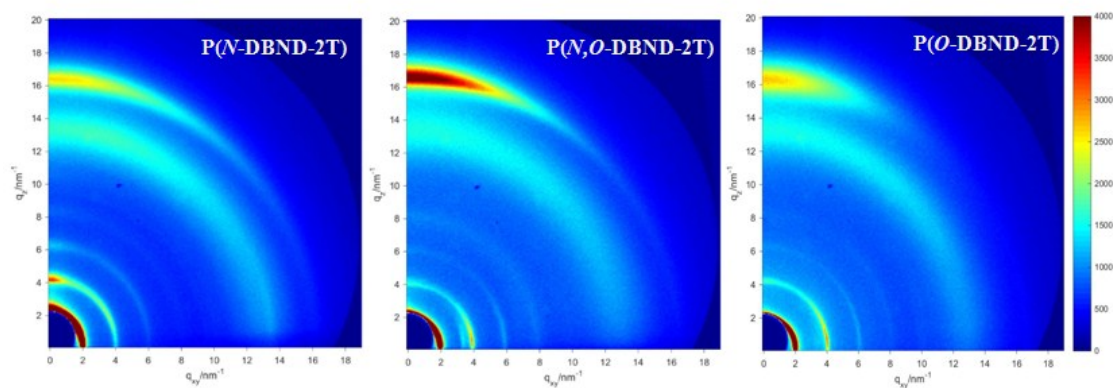

**Figure S4.** 2D-GIWAXS curves of P(N-DBND-2T), P(N,O-DBND-2T) and P(O-DBND-2T).

**Table S1.** Optimized geometries of half, *N* and *O*-DBND-2Ts and the corresponding calculated binding energies *E* (Kcal/mol), as well as the distances (Å) of two DBND-2T monomer.

|                     | Geometries                                                                          | Dipole Moment | IBE (Kcal/mol) |
|---------------------|-------------------------------------------------------------------------------------|---------------|----------------|
| <i>N,O</i> -DBND-2T | 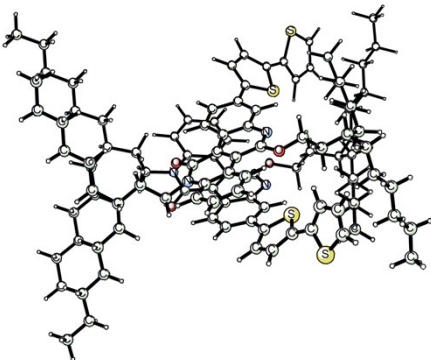   | 3.05 D        | -61.6          |
| <i>N</i> -DBND-2T   |   | 1.56 D        | -57.2          |
| <i>O</i> -DBND-2T   |  | 0.49 D        | -30.0          |



# $^1\text{H}$ and $^{13}\text{C}$ NMR spectra

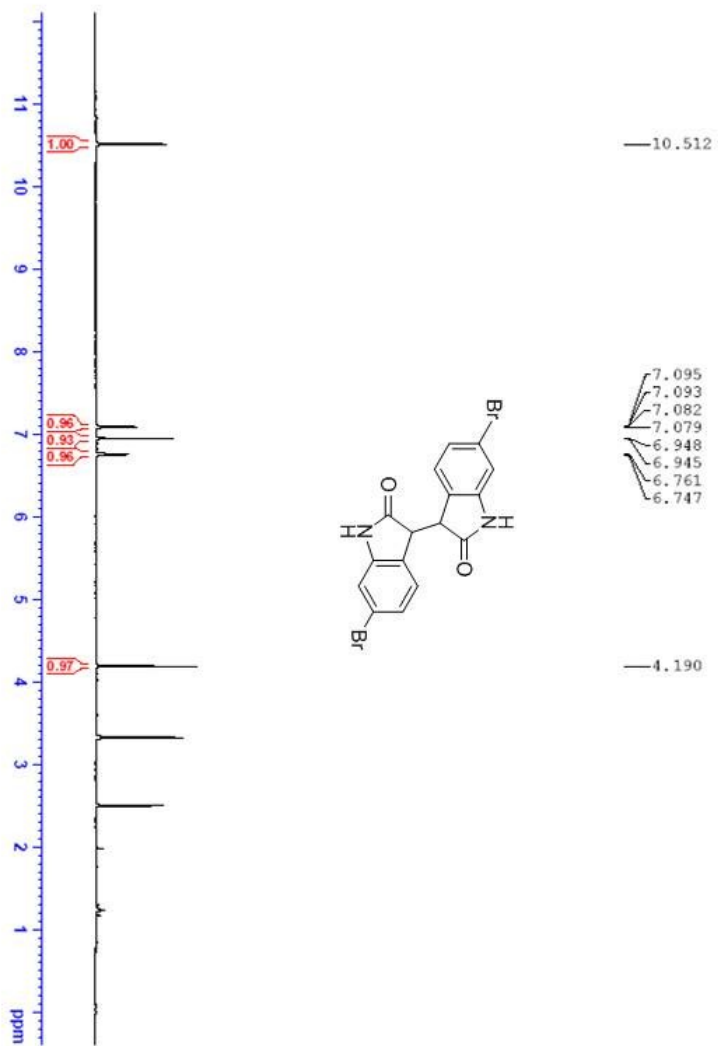

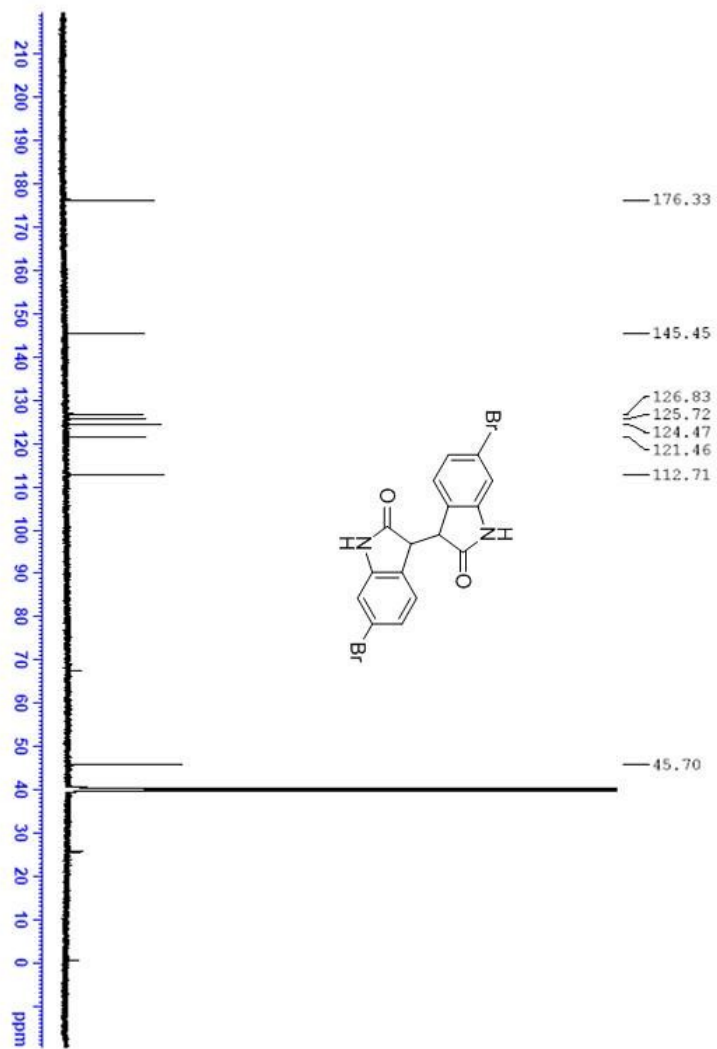

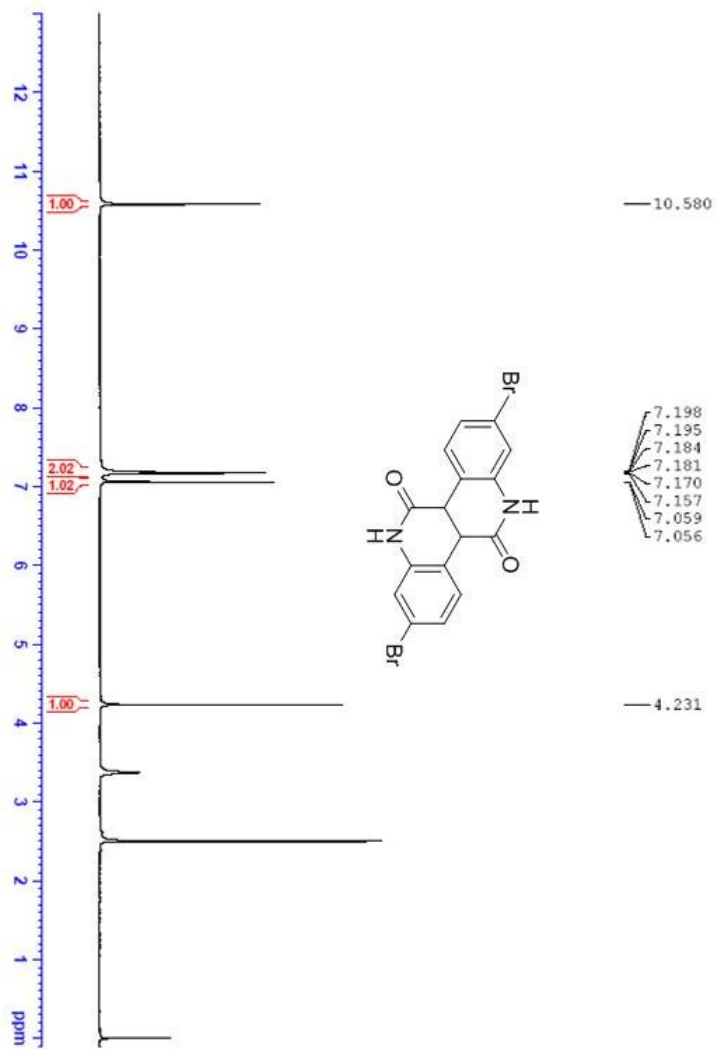

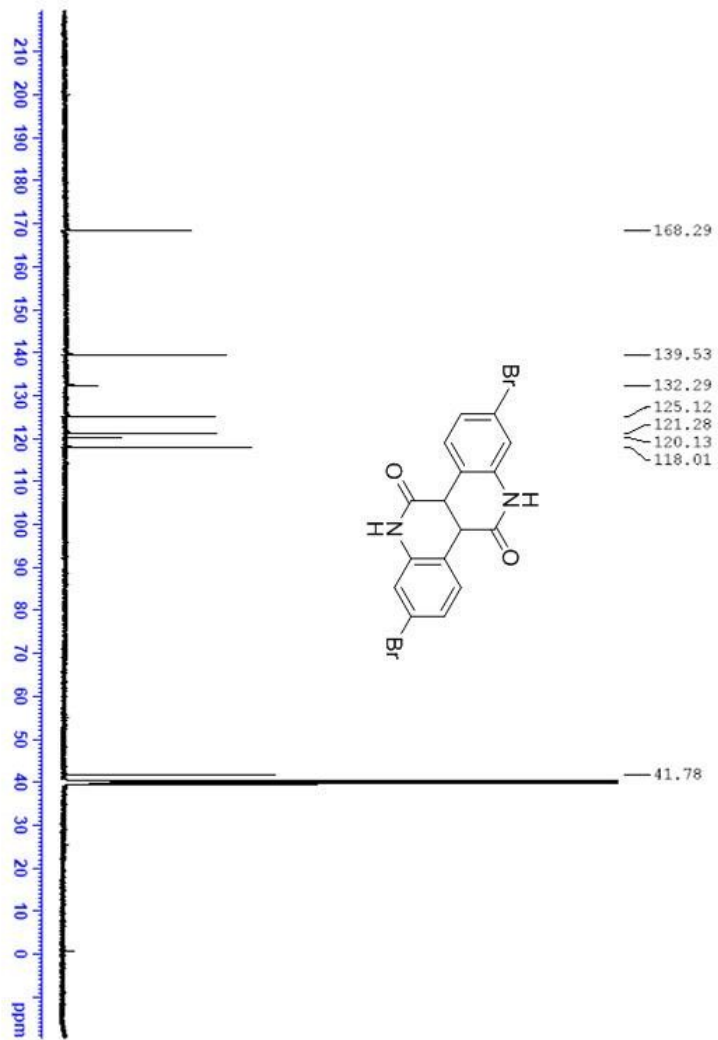

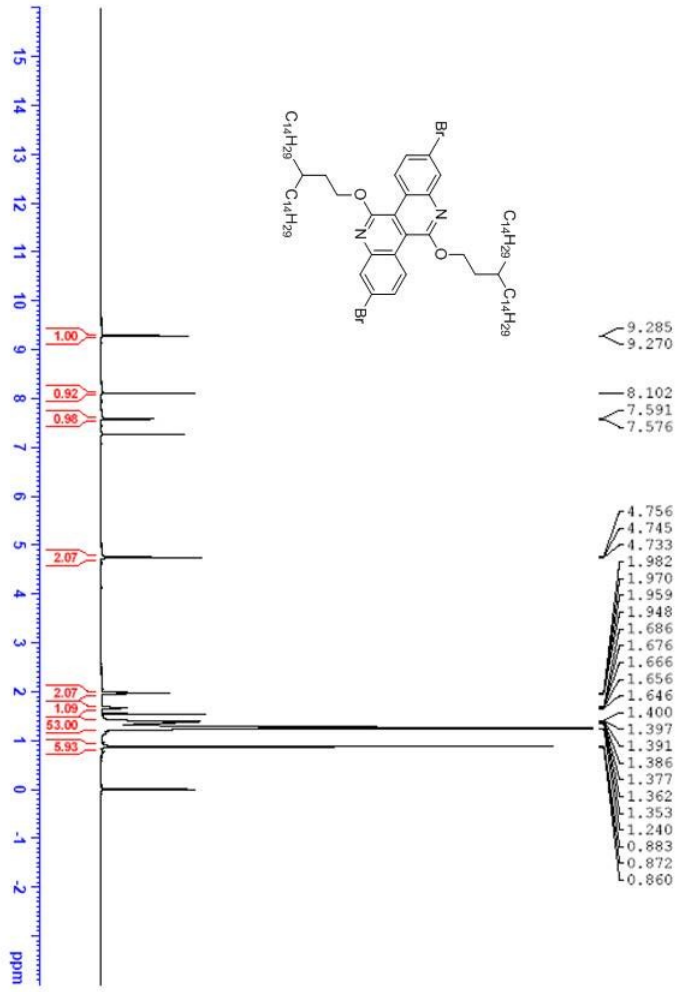

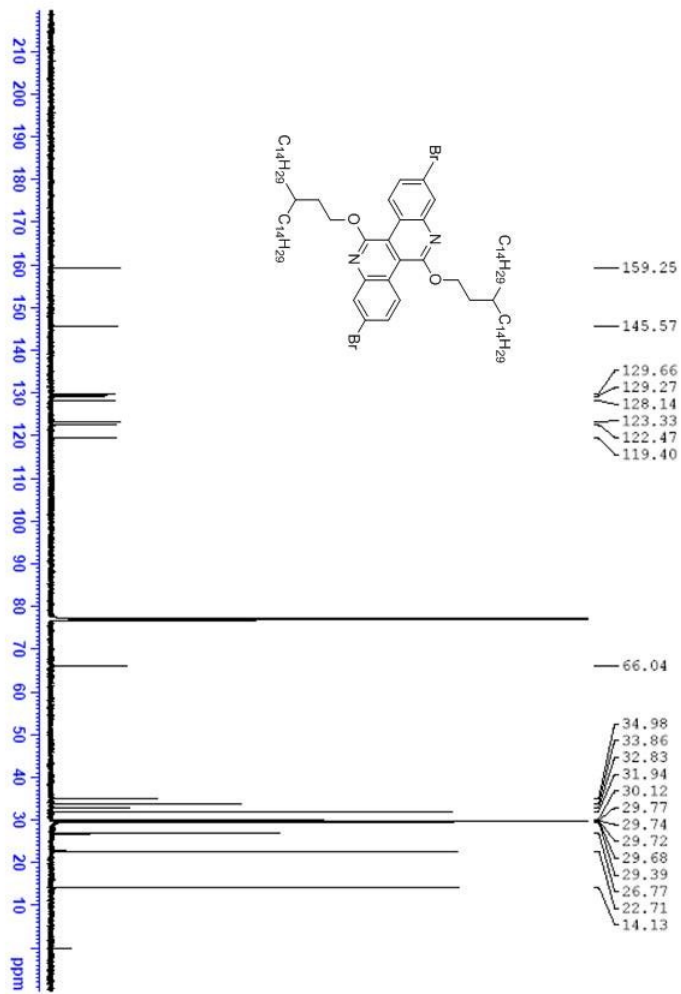

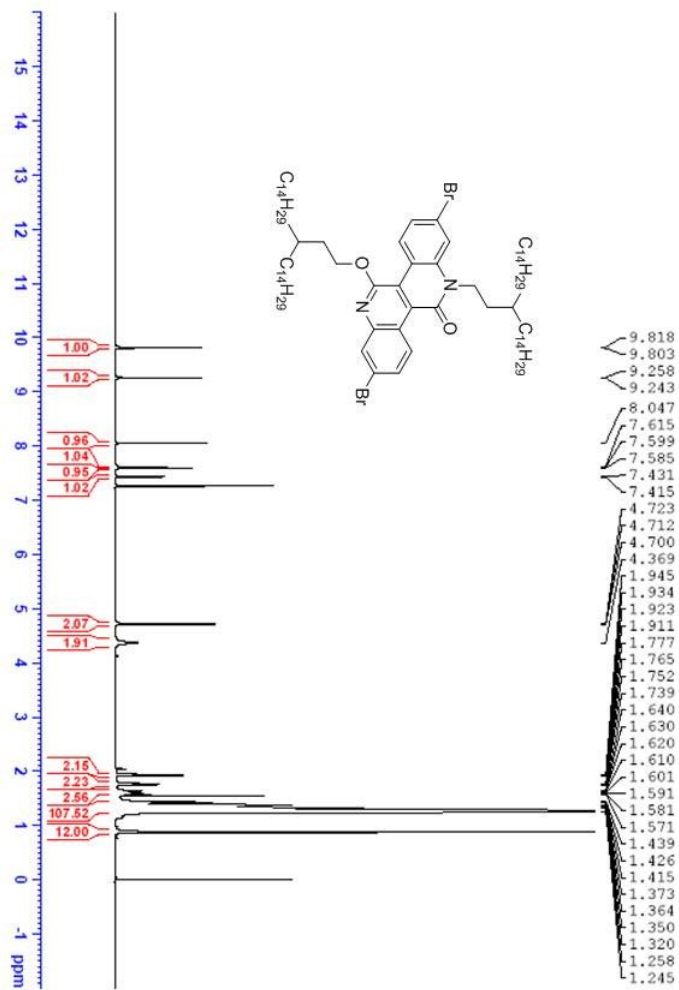

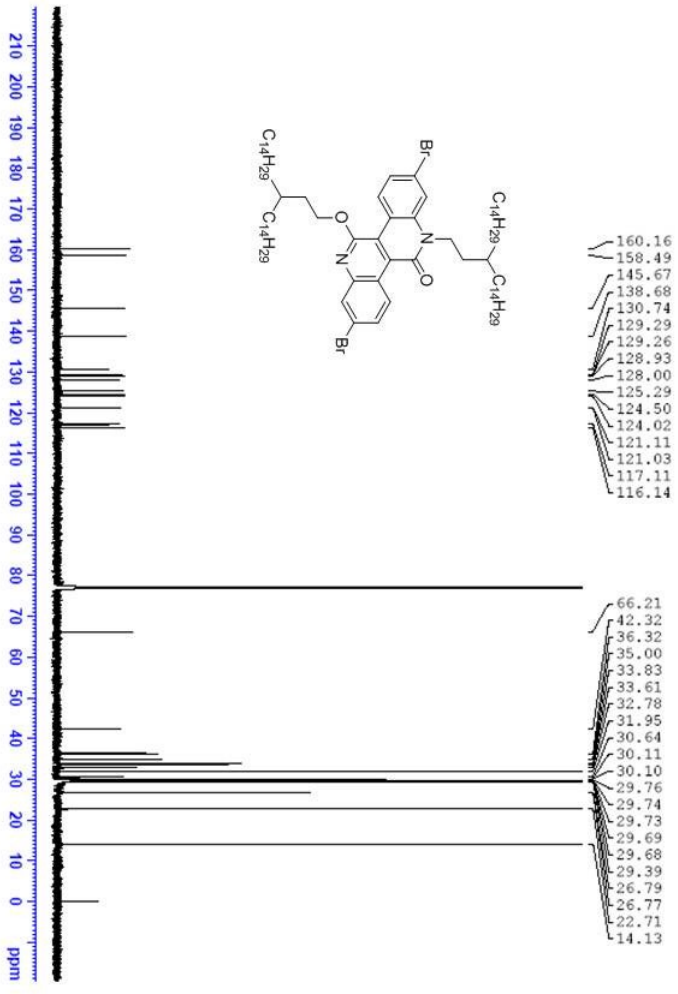



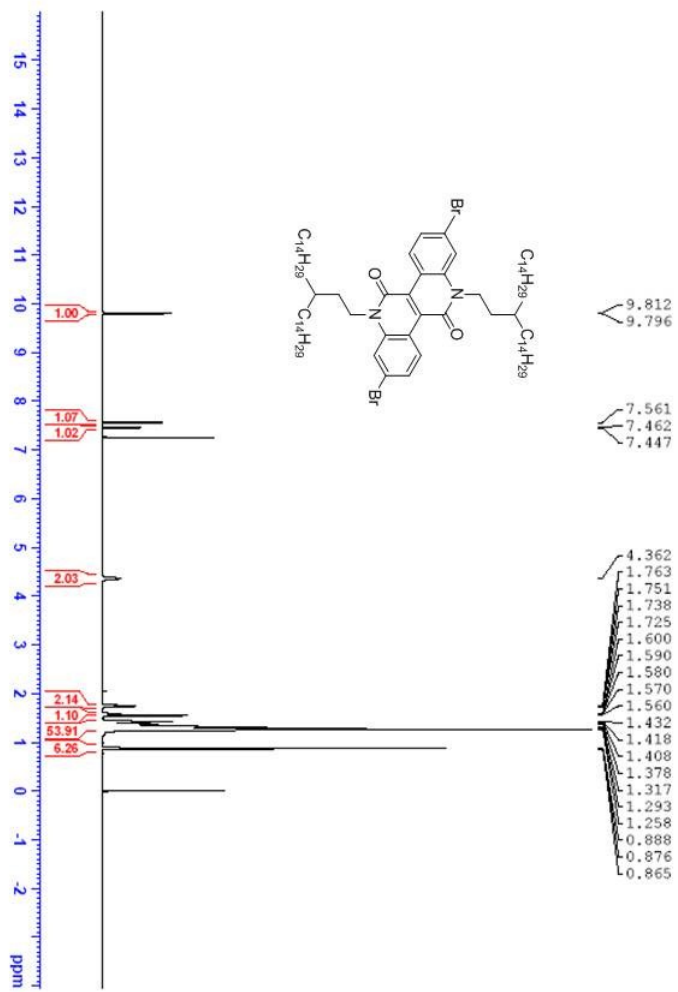

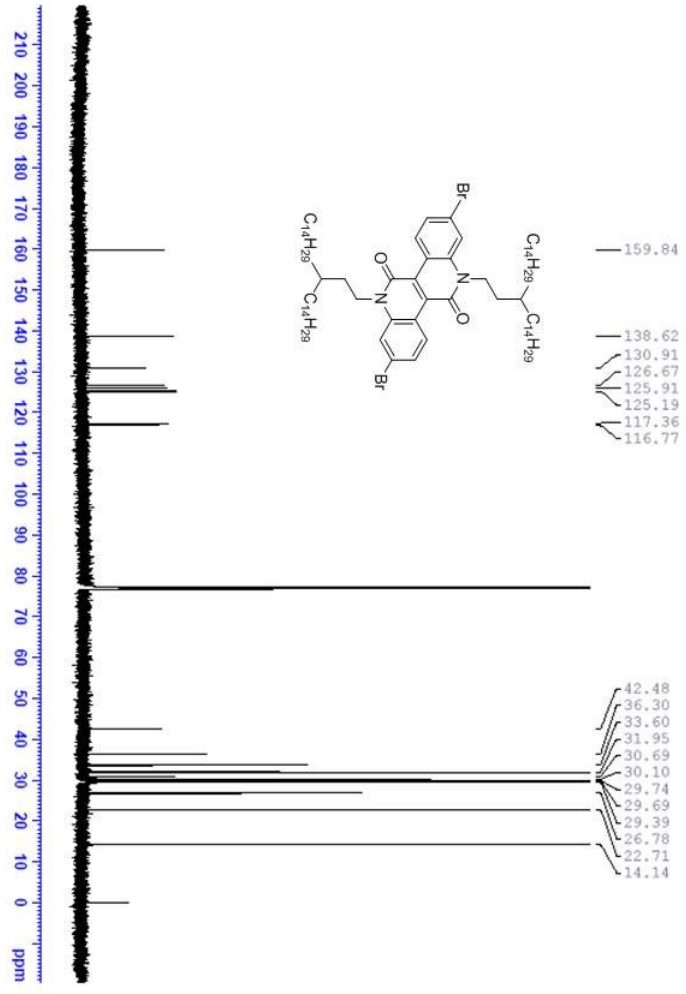

# IR spectra

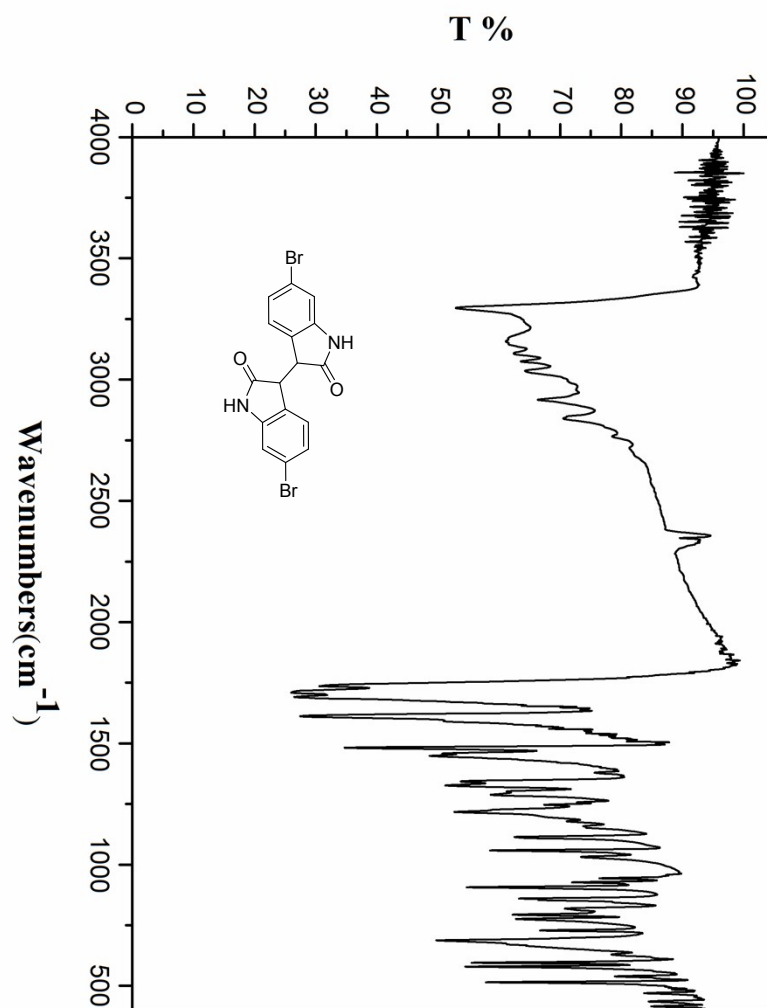

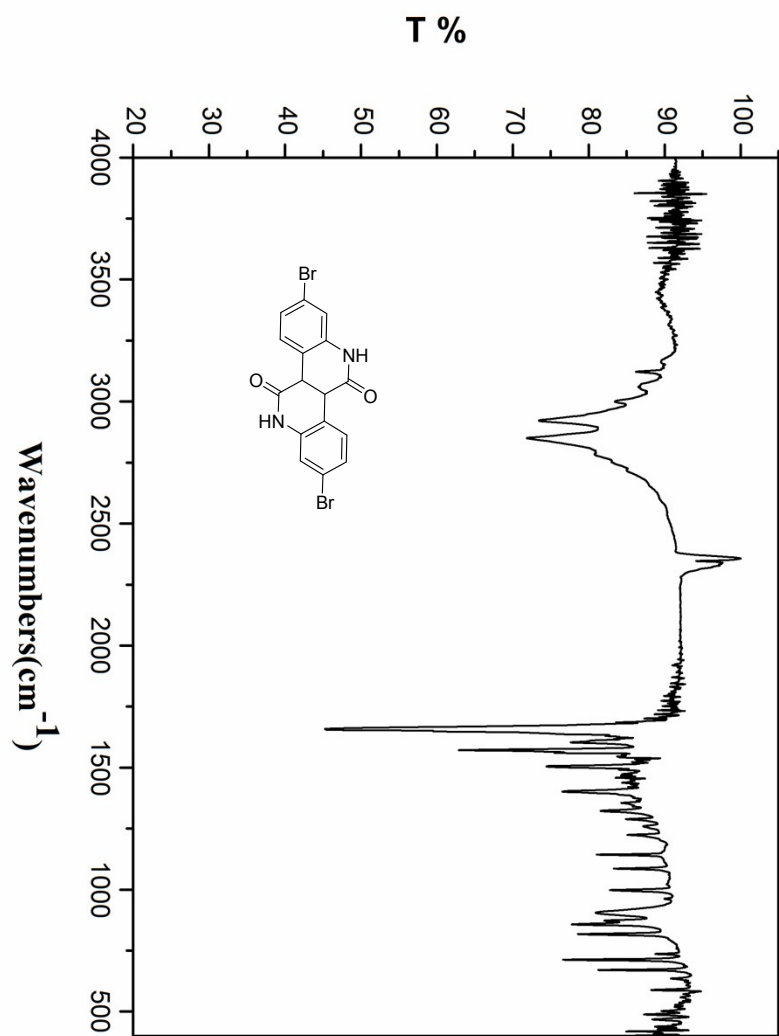

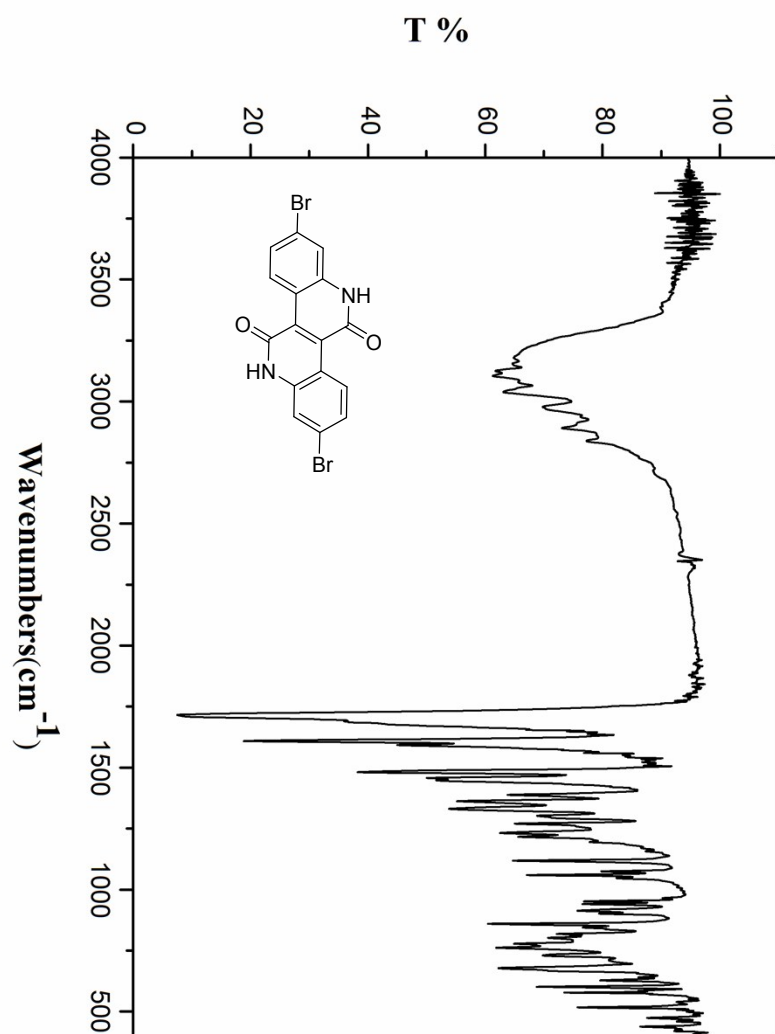

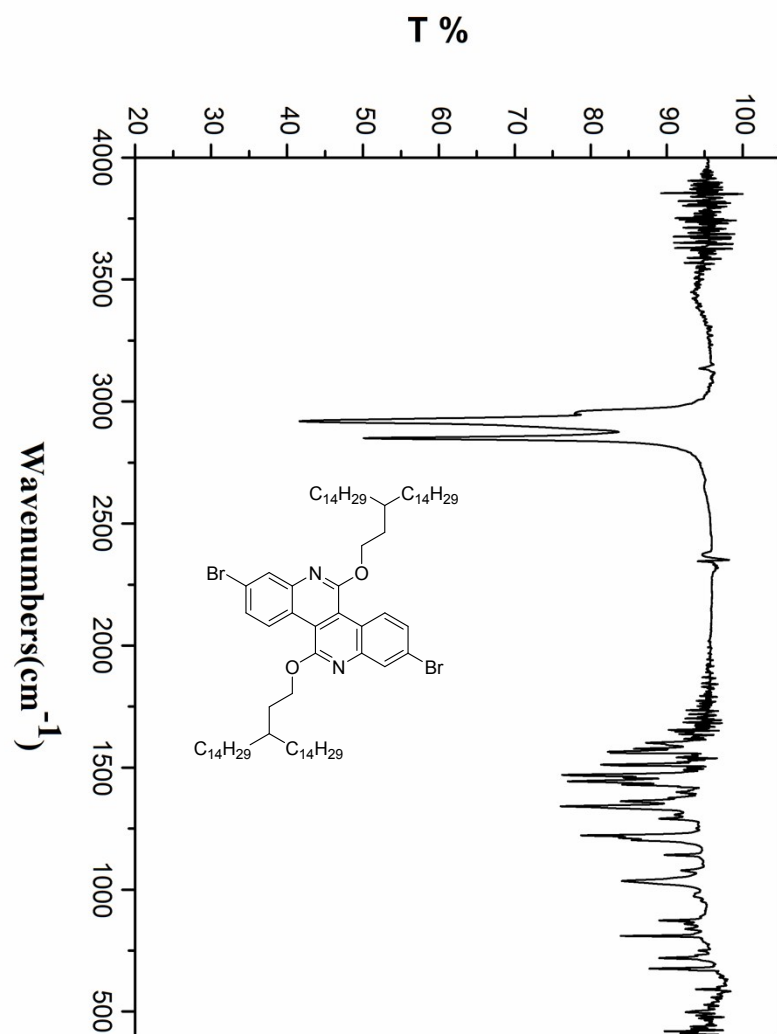

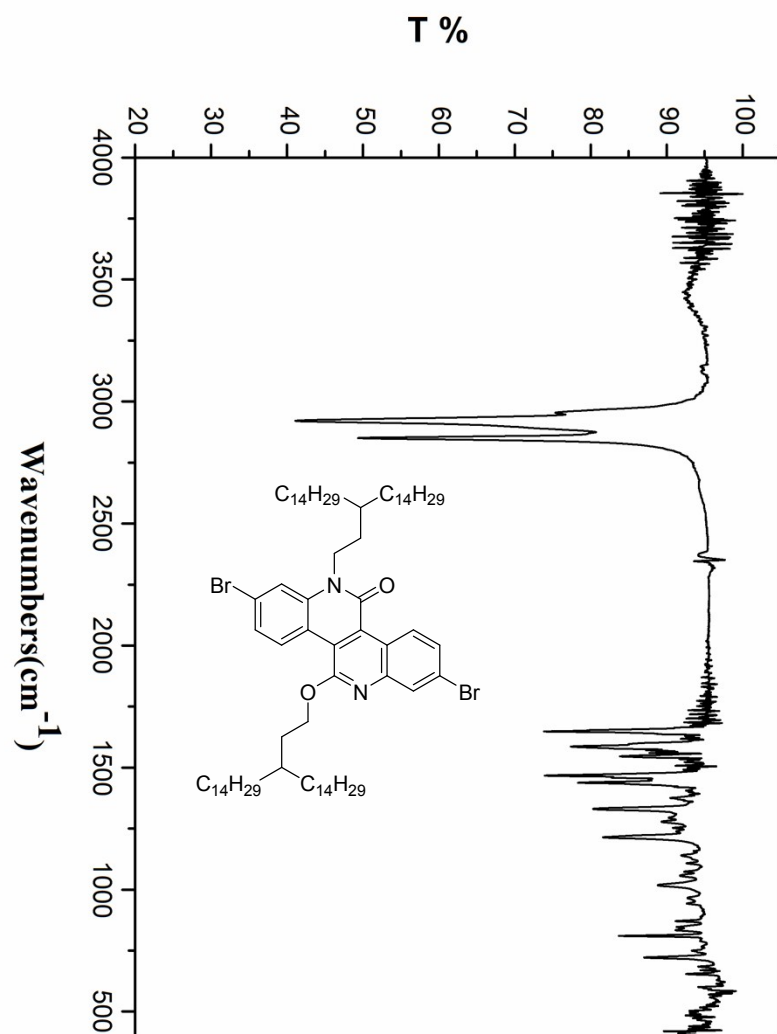

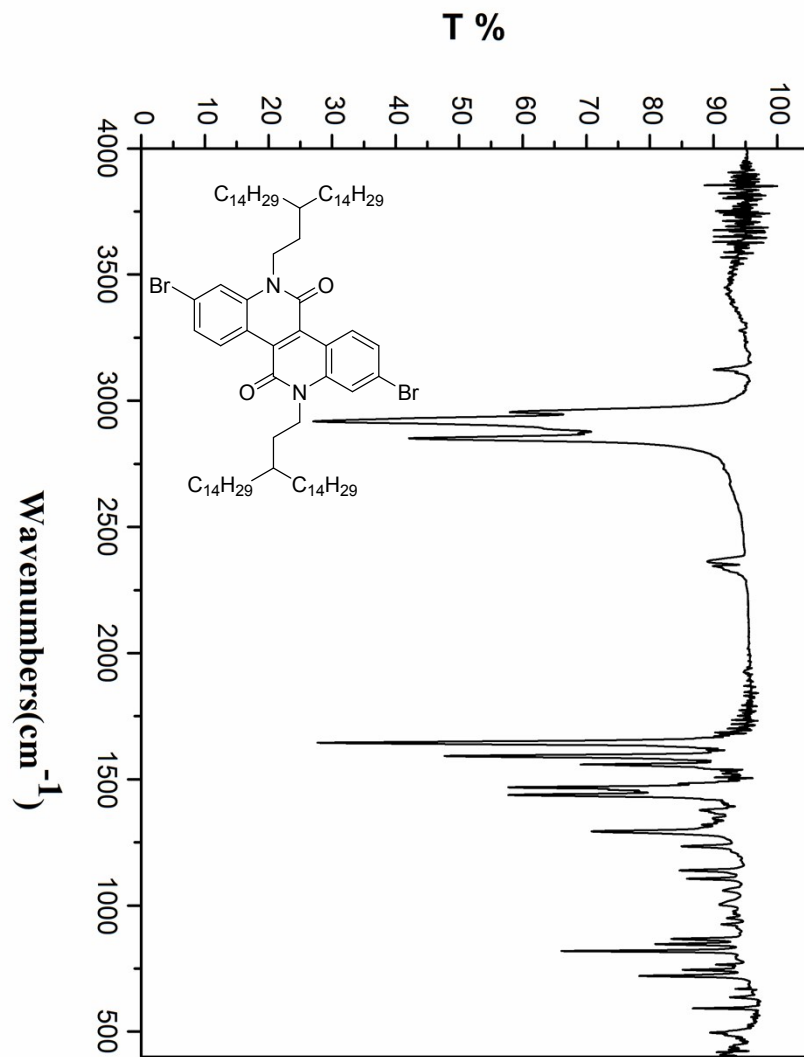

Supplement: c9ra01545k1.pdf [file c9ra01545k1.pdf]
